# Supplementary material for: CCCH Zinc Finger Genes in Barley: Genome-Wide Identification, Evolution, Expression and Haplotype Analysis
Source: Research Square preprint supplement (doi:10.21203/rs.3.rs-1114922/v1), 2021-11-30
Supplement: Supplementary file 1 [file 74103630e297c7bd8b96dac3.xlsx]

## Sheet: TableS1
TableS1.Validation of the CCCH domains using the NCBI-CDD, SMART and HMMER online databases.
Gene Name	NCBI-CDD										HMMER			SMART
	Hit type	PSSM-ID	From	To	E-Value	Bitscore	Accession	Short name	Incomplete	Superfamily	Hits Found	Top Hit		Name	Start	End	E-value
												Identifier	Description
HvC3H1	specific	395517	13	39	7.00784e-05	39.112	pfam00642	zf-CCCH	-	cl11592	2	zf-CCCH	Zinc finger C-x8-C-x5-C-x3-H type (and similar)	ZnF_C3H1	13	39	0.0059
HvC3H2	superfamily	227395	324	389	4.03555e-11	63.9179	cl34885	CTH1 superfamily	NC	-	2	zf-CCCH	Zinc finger C-x8-C-x5-C-x3-H type (and similar)	ZnF_C3H1	326	353	5.25e-09
HvC3H3	superfamily	227395	249	326	2.31821e-12	66.9995	cl34885	CTH1 superfamily	NC	-	2	zf-CCCH	Zinc finger C-x8-C-x5-C-x3-H type (and similar)	ZnF_C3H1	251	278	9.8e-09
HvC3H4	specific	395517	1175	1201	7.63305e-08	49.5124	pfam00642	zf-CCCH	-	cl11592	3	zf-CCCH	Zinc finger C-x8-C-x5-C-x3-H type (and similar)	ZnF_C3H1	1174	1201	6.72e-07
HvC3H5	specific	408151	238	256	5.85497e-05	40.0898	pfam18345	zf_CCCH_4	-	cl39030	2	zf-CCCH	Zinc finger C-x8-C-x5-C-x3-H type (and similar)	ZnF_C3H1	234	258	0.00275
HvC3H6	-	-	-	-	-	-	-	-	-	-	2	zf-CCCH	Zinc finger C-x8-C-x5-C-x3-H type (and similar)	ZnF_C3H1	178	204	0.00479
HvC3H7	specific	214632	269	295	6.65395e-07	44.9277	smart00356	ZnF_C3H1	-	cl11592	5	zf-CCCH	Zinc finger C-x8-C-x5-C-x3-H type (and similar)	ZnF_C3H1	269	295	7.42e-09
HvC3H8	superfamily	406158	22	146	2.82297e-16	74.8294	cl25863	zf-CCCH_3 superfamily	-	-	4	zf-CCCH_3	Zinc-finger containing family	ZnF_C3H1	22	49	0.0024
HvC3H9	specific	214632	111	135	0.000241378	37.9941	smart00356	ZnF_C3H1	-	cl11592	1	zf-CCCH	Zinc finger C-x8-C-x5-C-x3-H type (and similar)	ZnF_C3H1	110	136	3.04e-05
HvC3H10	specific	395517	56	82	1.70752e-05	40.2676	pfam00642	zf-CCCH	-	cl11592	1	zf-CCCH	Zinc finger C-x8-C-x5-C-x3-H type (and similar)	ZnF_C3H1	55	82	5.29e-05
HvC3H11	specific	395517	62	88	3.0656e-05	39.8824	pfam00642	zf-CCCH	-	cl11592	1	zf-CCCH	Zinc finger C-x8-C-x5-C-x3-H type (and similar)	ZnF_C3H1	61	88	0.000243
HvC3H12	specific	395517	301	327	7.86406e-08	47.9716	pfam00642	zf-CCCH	-	cl11592	4	zf-CCCH	Zinc finger C-x8-C-x5-C-x3-H type (and similar)	ZnF_C3H1	300	327	8.6e-05
HvC3H13	specific	395517	148	174	2.35048e-07	46.4308	pfam00642	zf-CCCH	-	cl11592	5	zf-CCCH	Zinc finger C-x8-C-x5-C-x3-H type (and similar)	ZnF_C3H1	147	174	1.44e-06
HvC3H14	specific	395517	451	474	2.22992e-06	44.1196	pfam00642	zf-CCCH	-	cl11592	4	zf-CCCH	Zinc finger C-x8-C-x5-C-x3-H type (and similar)	ZnF_C3H1	447	474	6.17e-06
HvC3H15	specific	395517	310	336	9.51406e-10	52.9792	pfam00642	zf-CCCH	-	cl11592	3	zf-CCCH	Zinc finger C-x8-C-x5-C-x3-H type (and similar)	ZnF_C3H1	309	336	6.12e-10
HvC3H16	specific	395517	13	39	5.12129e-05	39.4972	pfam00642	zf-CCCH	-	cl11592	2	zf-CCCH	Zinc finger C-x8-C-x5-C-x3-H type (and similar)	ZnF_C3H1	13	39	0.00514
HvC3H17	specific	395517	373	399	1.82369e-07	46.816	pfam00642	zf-CCCH	-	cl11592	4	zf-CCCH	Zinc finger C-x8-C-x5-C-x3-H type (and similar)	ZnF_C3H1	373	399	2.38e-07
HvC3H18	specific	395517	229	253	1.51601e-06	43.7344	pfam00642	zf-CCCH	-	cl11592	2	zf-CCCH	Zinc finger C-x8-C-x5-C-x3-H type (and similar)	ZnF_C3H1	228	254	1.68e-07
HvC3H19	superfamily	227481	177	321	1.03384e-41	145.603	cl27117	COG5152 superfamily	N	-	3	zf-CCCH	Zinc finger C-x8-C-x5-C-x3-H type (and similar)	ZnF_C3H1	184	211	9.65e-08
HvC3H20	specific	395517	670	690	0.0013371	36.4156	pfam00642	zf-CCCH	-	cl11592	1	zf-CCCH	Zinc finger C-x8-C-x5-C-x3-H type (and similar)	-	-	-	-
HvC3H21	specific	395517	268	290	2.45343e-05	41.038	pfam00642	zf-CCCH	-	cl11592	4	zf-CCCH	Zinc finger C-x8-C-x5-C-x3-H type (and similar)	ZnF_C3H1	263	290	9.22e-05
HvC3H22	specific	395517	101	126	2.53297e-07	46.4308	pfam00642	zf-CCCH	-	cl11592	4	zf-CCCH	Zinc finger C-x8-C-x5-C-x3-H type (and similar)	ZnF_C3H1	99	126	5.38e-06
HvC3H23	specific	395517	13	39	7.3754e-05	39.112	pfam00642	zf-CCCH	-	cl11592	2	zf-CCCH	Zinc finger C-x8-C-x5-C-x3-H type (and similar)	ZnF_C3H1	13	39	0.00479
HvC3H24	specific	409956	237	334	2.57063e-45	157.426	cd12540	RRM_U2AFBPL	-	cl17169	2	zf-CCCH	Zinc finger C-x8-C-x5-C-x3-H type (and similar)	ZnF_C3H1	338	367	0.0167
HvC3H25	superfamily	227395	68	209	4.2122e-09	55.0583	cl34885	CTH1 superfamily	N	-	4	zf-CCCH	Zinc finger C-x8-C-x5-C-x3-H type (and similar)	ZnF_C3H1	72	98	0.00834
HvC3H26	specific	407881	319	339	3.74521e-06	42.9733	pfam18044	zf-CCCH_4	-	cl39030	5	zf-CCCH	Zinc finger C-x8-C-x5-C-x3-H type (and similar)	ZnF_C3H1	315	341	6.52e-05
HvC3H27	specific	395517	103	128	0.00124628	35.6452	pfam00642	zf-CCCH	-	cl11592	4	zf-CCCH	Zinc finger C-x8-C-x5-C-x3-H type (and similar)	ZnF_C3H1	101	128	0.0542
HvC3H28	superfamily	416331	6	26	0.00457674	34.1421	cl11592	zf-CCCH superfamily	-	-	6	zf-CCCH	Zinc finger C-x8-C-x5-C-x3-H type (and similar)	ZnF_C3H1	2	27	6.52e-05
HvC3H29	specific	214632	226	247	0.000600737	37.9941	smart00356	ZnF_C3H1	-	cl11592	4	zf_CCCH_4	Zinc finger domain	ZnF_C3H1	223	247	0.0271
HvC3H30	superfamily	406158	25	82	8.83498e-12	62.1178	cl25863	zf-CCCH_3 superfamily	C	-	2	zf-CCCH_3	Zinc-finger containing family	ZnF_C3H1	24	52	0.00447
HvC3H31	superfamily	406158	107	166	1.06706e-05	44.3986	cl25863	zf-CCCH_3 superfamily	C	-	7	zf-CCCH	Zinc finger C-x8-C-x5-C-x3-H type (and similar)	ZnF_C3H1	108	134	1.52e-05
HvC3H32	specific	395517	242	267	1.72581e-08	49.5124	pfam00642	zf-CCCH	-	cl11592	3	zf-CCCH	Zinc finger C-x8-C-x5-C-x3-H type (and similar)	ZnF_C3H1	241	268	6.03e-09
HvC3H33	specific	395517	263	288	5.74691e-07	44.89	pfam00642	zf-CCCH	-	cl11592	5	zf-CCCH	Zinc finger C-x8-C-x5-C-x3-H type (and similar)	ZnF_C3H1	262	288	7.84e-08
HvC3H34	specific	214632	2	26	3.27263e-07	46.0833	smart00356	ZnF_C3H1	-	cl11592	3	zf-CCCH	Zinc finger C-x8-C-x5-C-x3-H type (and similar)	ZnF_C3H1	2	28	7.72e-07
HvC3H35	specific	214632	15	40	4.82875e-06	42.6165	smart00356	ZnF_C3H1	-	cl11592	1	zf-CCCH	Zinc finger C-x8-C-x5-C-x3-H type (and similar)	ZnF_C3H1	14	40	1.65e-06
