# Supplementary material for: CCCH Zinc Finger Genes in Barley: Genome-Wide Identification, Evolution, Expression and Haplotype Analysis
Source: Research Square preprint supplement (doi:10.21203/rs.3.rs-1114922/v1), 2021-11-30
Supplement: Supplementary file 2 [file 3a374017f1597c7ede0923f1.xlsx]

## Sheet: TableS7
Table S7. SNP distribution, genetic diversity and wright’s F-statistic values of the 22 HvC3Hs in wild and domesticated barley.
HvC3Hs	Gene	SNP			Haplotype		Wild Pi	Landrace Pi	Fst wild vs landrace
		intron variant	non-synonymous variant	synonymous variant	Wild haplotype number	Landrace haplotype number
HvC3H3	HORVU.MOREX.r2.1HG0074970	0	1	0	4	3	0.331343	0.0216203	0.225264
HvC3H4	HORVU.MOREX.r2.1HG0078680	6	0	0	8	8	0.109328	0.11824	0.000895198
HvC3H5	HORVU.MOREX.r2.2HG0091490	-	-	-	-	-	-	-	-
HvC3H6	HORVU.MOREX.r2.2HG0140180	1	0	0	2	1	0.0388274	0	0.0129971
HvC3H8	HORVU.MOREX.r2.2HG0176080	1	0	0	4	2	0.367893	0	0.301812
HvC3H9	HORVU.MOREX.r2.3HG0196310	0	0	1	3	2	0.0412281	0	0.0134176
HvC3H12	HORVU.MOREX.r2.3HG0210880	8	0	0	9	13	0.0269646	0.0893125	0.0401902
HvC3H13	HORVU.MOREX.r2.3HG0210900	8	0	0	9	10	0.0678654	0.0346703	0.0428162
HvC3H14	HORVU.MOREX.r2.3HG0225190	42	0	0	36	70	0.0560287	0.0714064	0.0647072
HvC3H15	HORVU.MOREX.r2.3HG0228250	0	2	1	6	14	0.168252	0.237959	0.142592
HvC3H17	HORVU.MOREX.r2.3HG0258540	1	0	0	3	1	0.162493	0	0.109191
HvC3H20	HORVU.MOREX.r2.5HG0362710	8	1	0	10	18	0.0441139	0.0961505	0.0940079
HvC3H21	HORVU.MOREX.r2.5HG0374920	170	1	1	51	94	0.0714115	0.0344314	0.211986
HvC3H22	HORVU.MOREX.r2.5HG0377520	11	1	0	16	26	0.059639	0.0615632	0.049901
HvC3H24	HORVU.MOREX.r2.5HG0429150	2	0	0	4	1	0.112771	0	0.0721641
HvC3H27	HORVU.MOREX.r2.6HG0475570	1	0	0	4	4	0.0599621	0.0561424	-0.0140572
HvC3H28	HORVU.MOREX.r2.6HG0505660	3	0	0	5	6	0.0391099	0.103216	0.0227833
HvC3H29	HORVU.MOREX.r2.6HG0515160	2	0	0	6	3	0.132923	0.106962	0.00035585
HvC3H30	HORVU.MOREX.r2.6HG0526270	16	0	0	27	27	0.116589	0.135126	0.0467387
HvC3H31	HORVU.MOREX.r2.7HG0560290	0	1	0	2	3	0	0.011236	-0.00402173
HvC3H32	HORVU.MOREX.r2.7HG0579580	10	0	0	10	6	0.154708	0.0433639	0.15304
HvC3H33	HORVU.MOREX.r2.7HG0600900	-	-	-	-	-	-	-	-
HvC3H34	HORVU.MOREX.r2.7HG0602740	20	1	2	29	12	0.0958406	0.00403192	0.0585684
HvC3H35	HORVU.MOREX.r2.7HG0607870	8	0	0	16	9	0.0416468	0.0215539	0.0246477
