# Supplementary material for: CCCH Zinc Finger Genes in Barley: Genome-Wide Identification, Evolution, Expression and Haplotype Analysis
Source: Research Square preprint supplement (doi:10.21203/rs.3.rs-1114922/v1), 2021-11-30
Supplement: Supplementary file 3 [file 71fb8e9d8961ad49690c9430.xlsx]

## Sheet: TableS2
Table S2. Detailed information of CCCH proteins in barley.
Gene name	Transcript ID	No of CCCH motifs	C-XA-C-XB-C-XC-H			CCCH motif sequences	Protein sequences
			A	B	C
HvC3H1	HORVU.MOREX.r2.1HG0072390.1	2	8	5	3	ZnF1:CPFYFKIGACRHGDRCSRLH	MAEHLASIFGTEKDRVNCPFYFKIGACRHGDRCSRLHNRPTTSPTIVLANMYQRPDMITP GVDAQGVAIAPEKMQEHFEDFYEDIYEELSKFGEVETLNVCDNLADHMIGNVYVQFREEE QAVAAHNALQGRFYSGRPIIVEYSPVTDFREATCRQFEENSCNRGGYCNFMHVKQIGREL RRKLYGGRSRRSHGRSRSPSPQHRRDNRDRGGDFRRDGRDEYRGGGGGGGGGGYRGGDGG GYRGGGGGGGYRGGGGGRHDRYDDGPRRRYGGSPPRRGRSPPARENSEERRAKIEQWNRE REEK*
			7	5	3	ZnF2:CRQFEENSCNRGGYCNFMH
HvC3H2	HORVU.MOREX.r2.1HG0074950.1	1	8	5	3	ZnF1:CNKWEETGACLYGDQCQFAH	MQEAPLVPAHPVPFGFWPRPVCFFYAGCTPFVPCPSPSPLGSPVVPIPTPSPRGTTFVPI PGPSPLGSPFIANPGPSPRATTFAPSPRPSPRATPVTPCTRTSSRGSPFTPSPRAQPGGT PWSSSSSSGSRVDDAAATEHRLRLARLALQYQDATNRYELCLSHLADAAREAAALRLENS ELRVANNDLAGRFAMLGGNQASAVALAGQLRGVHLGQMQVQVPAVASPPVLPMPMARPRP ASPAEKHTVMPKSISIRSTGYLKMAKDGKHRVTKPMDVGSQRMFVGVDVGGAKAEEHKGG TDGGEKRAHVVKSAAGLEFEVYSQGMYKTELCNKWEETGACLYGDQCQFAHGIAELRPII RHPRYKTQVCRMVIGGGLCPYGHRCHFRHSITP…
HvC3H3	HORVU.MOREX.r2.1HG0074970.1	1	8	5	3	ZnF1:CNKWGETGACPYGDQCQFAH	MQEAPLQPAHFVPRPRPSARGSPPFTPSPRTSSSSGSPWTSSSGSRVDDGDVDTAAAEHA LRMARLALQYQDFANRYQLCVSHLADAAREAAAIRHDNSGLRLANNSLAARFAMLGGIQA SAVALADQLCRLHLGQMQPMPMARLASSDEKLRPLHVGQTQAQVVPAPPVLPASPAEKHA AMPKSISIRSKGYLKHRVTKPVNVGSQQRVFVGVNGAKAEEHKGGSDGGEKGGQVATDAG GLQFQVYSQGMYKTELCNKWGETGACPYGDQCQFAHGIAELRPITRHPLYKTQVCRMFIG GVLCPYGHRCHFRHSITPADHIPLFHP*
HvC3H4	HORVU.MOREX.r2.1HG0078680.1	6	8	5	3	ZnF1:CPSYMSKGTCTYGPSCHFNH	MIGDDAHPTTPPPSPPPIAPTPSPLGLGRRLLGSIRALSSAIALPSSPTTPAAASSSPRL GRGLSLLLHLKPDLQLNPPPPSSTASASASASASHQDQDQDQDAEDQQPTHAPKAKRALI LAPQTTTPSLAPSAPVHHHHRQDETQGGHDPGPTKGLNVLHQHKGDLPLLTHRHQPTLFS TVHHRLAAAAPMDDRHPHPHRDTSLVHHHHLKVADAPIHDDDHHLKVADAPIHDDDHHLK LLDATAPPTPRDHAIAAAAAHQQQELPTHGLPTGSTRDNRAVQPQEVQLEQGVVALAGVG LATQDDTAVDRDATIHDHNYAIAVDAHHQEQVKPLLEQCTSTSTSCEDLGTPAMDNDDDA VQLQEVMEQQHATHPRDEYIAAEEQSEMLDREL…
			8	5	3	ZnF2:CDYYMRTGACRYGKNCHFNH
			8	5	3	ZnF3:CPFLARYGDCKFASACKYH
			8	5	3	ZnF4:CPFYMRFGDCKFASACNYHH
			8	5	3	ZnF5:CPFYMKRGFCKFGAQCKFYH
			8	5	3	ZnF6:CPFYMKSGKCQFGSLCEFRH
HvC3H5	HORVU.MOREX.r2.2HG0091490.1	1	7	5	3	ZnF1:CLYYARGYCKNGSACRFVH	MDAYEATKVVFARIQGLDPDHAAKIMGLLLIQDHGEKEMIRLAFGPEALLLAVMAKARKD LGLLPASSGPGTPTSAAATGHSPFMLSRQNSGRGGGGTAPSPLSVSSPSSWAPPPVFSRS NSVSNGSAAEEMAGVGEELMSPANGPQSPFFGGGGDSLILDELHLQDQLAFLSEGGMGGG GRQLPLFDNGECRSPSGGDGGLFPYGAGWANGGPGHRRSASVSELCFGGGDGLGWKPCLY YARGYCKNGSACRFVHGGFPDDLAGAKMDQAAVEQQCQDFLLRSKSQRLAAAAGFAYSPT GSLPGSPSAASKCLSLLLQQQQQQQNDGQRAAAAAAAAALMLGGDEAHKFMNRPRLDRGD FASMMNPGSRQIYLTFPADSTFREEDVSNYFSI…
HvC3H6	HORVU.MOREX.r2.2HG0140180.1	1	7	4	3	ZnF1:CRDFKRGECTRPTCRFYH	MASAEIPNADTADPNPNPSPNPAARSPSPPLPPRKRRLSLSPSRPPSPSRSVSRSRSPRD RRSRSRSRSRSRSRSRSRSRSRSRSRSPHQPDGKRRRQNDLTVEACRDYLRDRCTRSDLE CKYAHPHQSVSVDRDNKVTACADSLRNNCFRGRTCRYYHPPPHIQESLLRSIGIDVPTVK TVCRDFARGRCSRSANECRFLHHSSVQECAIVCQDFLRGRCDRISCRYTHVIAQPMLPPP MRDVPMQMPYPEMVYMPPPPPPLGIPMMAPPLSPPRGFADNKNTVEVCRDYLKNMCNRES CRFAHPDSQSEVAHDKVEVCRDFKRGECTRPTCRFYHPSSS*
HvC3H7	HORVU.MOREX.r2.2HG0166340.1	2	8	5	3	ZnF1:CTKYNTAEGCKFGDKCHFAH	MDAAARKRSRPESANGGAAGGKRSRESESQQTGLSSKSKPCTKFFSTIGCPFGEGCHFAH FVPGGYQAVSKSHNLGHAAVSAPSRTPADHAASGVKTRMCTKYNTAEGCKFGDKCHFAHG ERELGRPPSSYMSQESSYAPPTGGRYGGRHEPPPPASMGPPAGNFGASSTCKVSVDAALA GGIIGKGGVNTKQICRVTGVKLSIRDHESNPDLKNIELEGSFDQIKQANDMVRDLIGSIS ASMPSKNPAGAAAPAGRGGGGGGPGGRSNYKTKICENFLKGTCTFGERCHFAHGETEQRK GAAV*
			7	5	3	ZnF2:CENFLKGTCTFGERCHFAH
HvC3H8	HORVU.MOREX.r2.2HG0176080.1	1	7	5	3	ZnF1:CYYFQKGNCIKGDKCPFSH	MEADGAAAAEAKPLTPEEEALRRNTDCVYFLASPLTCKKGNQCDFRHSEGARMNPRDCYY WLNGNCLNPKCSFRHPPIDGMFGAPTPGIPALSSHYAAYNSGKQMVPCYYFQKGNCIKGD KCPFSHGPQTAGNNPPEQVAKVSSFPLEQPQTQKNEFLGVKEFAQTNHLVQQGGPIIDDR SKMSVNRAAANFARTAAAAMPAELASSAVKSLPKSGRVQNSMPAANKSVGTSSGEDHREC YQNNLPVETDPMQDWNQPYQTPPQDDLPEDSRDADDLLGESSPGFDVLVANDTDAGAYLH DADDFGRDIYPVEDYEYAPADFEIQPHHERELFNGMGEQGPIVQMYDGYDRKRRRTSSER NLDRPSYSERRSRQRETGPVEIDGSDLRHRLRR…
HvC3H9	HORVU.MOREX.r2.3HG0196310.1	1	7	5	3	ZnF1:CPDFRKGGCKRGDACEYAH	MMMMSEGVSVPPWGNLPVSGVDAGGGDETPFLFAALRQYLPCNDMAGAGGDDEDEAAAMA AAVDAYACDEFRMYDFKVRRCARGRSHDWTECPFAHPGEKARRRDPRKYHYSGTACPDFR KGGCKRGDACEYAHGVFECWLHPARYRTQPCKDGTACRRRVCFFAHTPDQLRAMPSQHSS PRSTPLSPLAESYDGSPLRRQAFESYLSKSIMSSSPTSTLLSSPPKSPPSESPPLSPDGA AASFRRGSWPGVGSPVNDVLASLRQLRLAKAQASPSGGWPAYPTSPAAYGSPKAGGLYSL PTTPMGTQTSASSFMANLEPLNLRFLDDEEPVQRVESGRALREKVFERLSRDGAAPRSCD VGAGAGGGPDVGWVSDLIN*
HvC3H10	HORVU.MOREX.r2.3HG0200320.1	1	8	5	3	ZnF2:CDKYEASGRCVYEDSCTFAH	MEGESRAAAANAFNGAPIRRWAEDVIVLSSGRPPRSEEAVAGQGQRTETPPEKLYYKTRL CDKYEASGRCVYEDSCTFAHGRAELRPPVAPPSHAVWRRPHDQEHGGGRVGHNFRDRGTC HFGDKFAFPHAAAPAPPGHAIHITGDQKLLADERRTATRPAMPSSATRYGAPGPARAFPP VPVPAARDRFGQMPEEDGGQKPNRLMLMSLRKTSGIYGDWPEQY*
HvC3H11	HORVU.MOREX.r2.3HG0200330.1	1	8	5	3	ZnF3:CEKYEVTGRCMYEDACTFAH	MEGEDHAAANAFNGAPTRRWAEDVIVLSSGRPPRSVEAVVVVNGEADGQGQHEEAPPERL YFKTRLCEKYEVTGRCMYEDACTFAHGRAELRPPVPPPSHAFAGGGRFVNGGGKVCFNFR DTGACHFGDKCAFPHAAAPATPGHAIRLTGGGDQRVLTDDWGSATPPARQTPGPRYAAPG SARAYPYPPVLPRDRLGQTMPEENGGKKPNRLMLMSQGKIAGIYGDWLDEED*
HvC3H12	HORVU.MOREX.r2.3HG0210880.1	5	8	5	3	ZnF1:CVYYLRTGACGYGETCRYNH	MMESYAASPKDGGGGGAEGGRADAATGLEESMWRLGLAGGEEAAGEGLPERPGEANCVYY LRTGACGYGETCRYNHPRDRAAAFDGGIRTTRTVEYPERPGQPPCEYYMKNGTCKFGSNC KYNHPREGGSVQPVVLNSSGYPLRLGEKECSYYIKTGHCKFGSTCKFHHPEGPELGVVSE PPNMYPPVQQLPVSSPLPYPPLASWQLGRPSVLPGSFFPGSYPPMMHPSAVMPMQGWNPY MSPMNQVAPAGGQQTVQAGPLYGLSHQGPPSAVAYGSNYASLSSSTWPSSDKQEVVFPER PGQPECHHYMKTGTCKFGSTCKYNHPQYLSTPRSNYMLSPLGLPIRPGAQPCLYYSQHGF CKFGPGCKFDHPLGALSYSPSASSLGDMPIAPY…
			8	5	3	ZnF2:CEYYMKNGTCKFGSNCKYNH
			8	5	3	ZnF3:CSYYIKTGHCKFGSTCKFHH
			8	5	3	ZnF4:CHHYMKTGTCKFGSTCKYNH
			8	5	3	ZnF5:CLYYSQHGFCKFGPGCKFDH
HvC3H13	HORVU.MOREX.r2.3HG0210900.1	5	8	5	3	ZnF1:CIYYLRTGACGFGDRCRYNH	MEPHPAAAAGGGGGEGEAGRGADPDTGLEGSMWRMGLAGDGGGEGDGARLPERPDQADCI YYLRTGACGFGDRCRYNHPRDRGGTEFGGGAKNAVALDYPERLGQPVCEYYMKTGTCKFG SNCKYHHPKQDGSVQPVMLNSNGFPLRPGEKECSYYMKTGQCKFGSTCKFHHPEFGGVPV TPGIYPPLQSSTVSSPHPYAPLTNWQMGRPPVVPGSYMPGSYTPMMLSSGMIPLQGWSPY PASVNPVASGGAQQTVQAGHMYGIGHHGSSSTIAYGGPYMPYSSSTIQSSNNQQEHGFPE RPGQPECQYYMRTGDCKFGATCKYHHPRDWSSPKSNYMFSPFCLPLRPGAQPCSYYAQNG YCRYGVACKYDHPMAKDPSVNQVGSPVAASEPS…
			8	5	3	ZnF2:CEYYMKTGTCKFGSNCKYHH
			8	5	3	ZnF3:CSYYMKTGQCKFGSTCKFHH
			8	5	3	ZnF4:CQYYMRTGDCKFGATCKYHH
			8	5	3	ZnF5:CSYYAQNGYCRYGVACKYDH
HvC3H14	HORVU.MOREX.r2.3HG0225190.1	6	8	5	3	ZnF1:CAFYMRTRTCKYEETCKFDH	MSGYPFYPYGRGGAGDDAAAMSGYPFYPYGRGGVGDDAAARYSSYEIDLIAARYAGDPSP YPYPYPSASGEFDTHVGARRPADVLYHRPIMGSHSTIGQSDDFYSPNTMAKRPRLESSLP IYPQRPGEKECAFYMRTRTCKYEETCKFDHPQWVPKGGIPKWKEGQKAEESYPERPGKPD CPFFVKTGMCKFGSECKFNHPKKKDDGTVAGSGDKESLLSGNSTLPVKPSEPCPVSLISG NSTLPVKPFKPCPHYAKGKCKLGTNCKFSHAKDMEAPSSGENESENTATAEAAGHNGAVH DLVSAKKVAAVALEQNSKGMPIRPGEVDCSFYIKTGSCRYGRACRFNHPERHNEASVVPG KILNPAAKFLPSFDFRAAHVPIEPEPITYPQRP…
			8	5	3	ZnF2:CPFFVKTGMCKFGSECKFNH
			7	5	3	ZnF3:CPHYAKGKCKLGTNCKFSH
			8	5	3	ZnF4:CSFYIKTGSCRYGRACRFNH
			8	5	3	ZnF5:CDFYKKTGFCKFSERCKFHH
			8	5	3	ZnF6:CAYYMKTGACKFGVQCKFDH
HvC3H15	HORVU.MOREX.r2.3HG0228250.1	1	8	5	3	ZnF1:CNKWEETGACPYGDQCQFAH	MACSPLYKPQHALPAPVYPPTSFIAVLSLCLHLIQRQEFVSRESSDMQEALVSPANADRL RSAFELKPYAFGDQRLSSSPRYLPSGDDGLYRCSSPFSPSLGFSSPSPLATSVSLSPSSS GSLVDDGDYDGAAAADATGHRLQLARLALQYQEVADRYEMCLSHLAEAVDEAAVLRRENT ELRVANSDLARRVALLGGKETAAVVIADEIRRFRLGEHKASKQRAPEKLAVLPKSISVRS NDYLKMNQAAPAAATPPAYSRKPRAANVNPSPVTQRAYLGLGVDGGKKGEEHKAKQDAAG ELDVYNQGMFKTELCNKWEETGACPYGDQCQFAHGVSELRPVIRHPRYKTEVCRMVLNGE VCPYGHRCHFRHSLTAAERLLRSR*
HvC3H16	HORVU.MOREX.r2.3HG0230880.1	2	8	5	3	ZnF1:CPFYFKIGACRHGDRCSRIH	MAEHLASIFGTEKDRVNCPFYFKIGACRHGDRCSRIHNRPTISPTIVLMNMYQRPDMITP GVDAQGQPIDPRKMQEHFEDFYEDIFEELSKFGEIETLNVCDNLSDHMIGNVYVQFREED QAAAAHTALQGRFYSGRLIIVDFSPVTDFREATCRQYEENTCTRGGHCNFMHVKQIGKDL RKKLFGRYRRSQRGRSRSPSPHHRRERRDRDDYRGRDDFRRGGGGGGGGRRGGSSRHERH DDGGRRRYGGSPPRRARSPVRENSEERRAKIEQWNRERETK*
			7	5	3	ZnF2:CRQYEENTCTRGGHCNFMH
HvC3H17	HORVU.MOREX.r2.3HG0258540.1	5	8	5	3	ZnF1:CTYYLRTGLCRFGMSCRFNH	MDEAGRASAPAVVTVTASAAAPSPPPPPPPATAAAAAADPPSPDPDALYEEGMWQQMTMN SGVTMQSGPYPVRPGEPDCTYYLRTGLCRFGMSCRFNHPQDRNTAIASARMKGEYPERVG QPECQYYLKTGTCKFGPTCKFHHPREKAGIAGMVQLNALGYPLRPNERECAYYLKTGQCK YGNTCKFNHPEIFNAVASSRGSPIYPPVHTSGSTGPHSYTGTMASWTYPRGSFIPSPRWQ SPSNYTPMIVPQGLVQVPSWNSYPGQMVPVSSPESRLQSPGAQQYYGTSRQGEGSAGNQG MQSPYRSSSFPVPQYALQRENVFPERPDQPECIYYIKTGDCKFGAVCKFHHPRVRSQPPP DCILSPMGLPLRPGEELCKFYSRYGICKFGVNC…
			8	5	3	ZnF2:CQYYLKTGTCKFGPTCKFHH
			8	5	3	ZnF3:CAYYLKTGQCKYGNTCKFNH
			8	5	3	ZnF4:CIYYIKTGDCKFGAVCKFHH
			8	5	3	ZnF5:CKFYSRYGICKFGVNCKFDH
HvC3H18	HORVU.MOREX.r2.4HG0318770.1	1	7	5	3	ZnF1:CNKWEGGACSYGSRCRFAH	MEGELGYLSPAGSSCVSTEGFGSSPREKLLAFTPSSRVSDGHRKGGLLSSPTWGSSSAET QLHSPSSCVSDGRYVSPLRVSAEQASEVREAERLLRAIADRYDDCFLRLRDATAEAADLR LERLRLRAENMHLSLLLEELEADQGKRAIAAAPTLPPKPTEGVAARGGAPKSISIRSKCY LSQAKQPQGEAEAQRLHVRPPPSIEQAGEDEAKGDGEVVELEAYRQGTKKTELCNKWEGG ACSYGSRCRFAHGLQDMRPVIRHPRYKTLPCQMFAAASGCPYGHRCHFRHSPAPAAQSY*
HvC3H19	HORVU.MOREX.r2.4HG0325540.1	1	8	5	3	ZnF1:CKDYKETGYCGYGDSCKFMH	MSDGGAGEPGAGGSEPVCNFVRKPPKNIRKRPAASVGSDDEEGSGGDDSGAIAAARSKKP PSTTSKLFFSSADNSHEPRRFQFESSRTIQSSTDSRATATLETETAYDRDARAIRERQLK QAEESLKKNPSASSSTGELYKGIHGYTDHKAGFRREHTVSGEKAGGAHGPLRASAHIRLS TRFDYQPDICKDYKETGYCGYGDSCKFMHDRGDYKSGWQLEREWDEAEKARKRRIAMREL DGSDGEAEEEDSDDEEALPFACFICREPFVDPVVTKCKHYFCEHCALKHHSKNKKCFVCN KPTLGIFNAAQEIRKKIAQDKKQQDL*
HvC3H20	HORVU.MOREX.r2.5HG0362710.1	1	8	5	3	ZnF1:CRYYQQGLWCPYEGSCKFSH	MAAATARTGLPPAEDDPLEGAESESEEEVESDEERGDDGSGAETLADLYGPDAGSDEDPS FDPAADKLAVGEAALWAGMARLSISARKGRKGPVALEVGNEDTDLLAMVDKLMRDGQLEK LKVYECKAYLRIHKLRLGGKKEELLNRIRDHTEVKNSGDVKYPVSSFVLNCKGDACKGDV VMFEQNIYKRKKGDPRGIKGRLCGQRTNAGRIIKESYGTAKQQHTFTVEIFWSKGYKPWP PLHPLLIKGRNLYKDKTMRQPWPDEQERSRVLQEKHARGFQARKSRDVRIHEKEIDKMRR FNRFNKGRTDSLQQGEPEKARQQQLSSKQNPAVHLFHQQFLNQGPSVQHGKPEKTRQQQI LARPSPAQQIFKHPAQHDNHRPTPALQMFKNPQ…
HvC3H21	HORVU.MOREX.r2.5HG0374920.1	5	8	5	3	ZnF1:CTYYLKFGTCRFGMKCKFNH	MADADAKAPAKSNLGADLIASISPSSTSSGAGNAAAIESQFTDLAISDELPKPSGWDDDD VLGIAGSDETTGEITGGKVQPVETADSRPRFPQRHAEPDCTYYLKFGTCRFGMKCKFNHP ARKKKNKVKASGSSGSGSNDISNKAFPPDDDQTPKEEYEDLVPDITADVDLLKGRMEATQ LKIADVTEKGIYLKKFNETEQKVAKENRKETVSEGTAQEECKYYSTPGGCKFGESCRYLH CEGKERKTEVAKVELNFLGLPLRPGGKECPYYMRTGSCKFATNCRFHHPDPTNVVSRDPL LEHENGDIPQQNVQASSQLNVPLWSADQRALNEHRVPSLAPAPSYSAGMIPPRGMYPSSE WSGYHQVPLGPYYTPGISFHHFPAPPVNHPMYR…
			8	5	3	ZnF2:CKYYSTPGGCKFGESCRYLH
			8	5	3	ZnF3:CPYYMRTGSCKFATNCRFHH
			8	5	3	ZnF4:CQHFVKSGFCKFKVKCKYHH
			8	5	3	ZnF5:CTYYERYGVCKFGPACMYNH
HvC3H22	HORVU.MOREX.r2.5HG0377520.1	5	8	5	3	ZnF1:CSYYMRTGFCRFGVTCKFNH	MAAAGAAAGGGGEGSSSPTGLTIGSHYGSTGEATWQMTLGCGGLSMEPGPYPERIGERDC SYYMRTGFCRFGVTCKFNHPADRKLAVAAARMKGEYPYRVGQPECQYYLKTGTCKFGATC KFHHPKEKAAIAISAQLNVLGYPLRLNEKECVYYLRTGQCKFASTCKFHHPQPSSTMVAI RSSICSPGQSTTSPGRNTYSGAVTNWSLSRSASFIASPRWPGPSGYEQVIVPQGLVQVPG WNPYAAQMGSSSLDGQQRTPGTAHYYGTHQRETTGMGEHGMFTSHKAGSAPLGVYAVQGE NTFPERPEQPECQFYMKTGDCKFGAVCKFNHPKKRMVPAPNCALSPLGLPLRPGEPICTF YSRYGICKFGPNCKFDHPMGTILYGSPTSPTGD…
			8	5	3	ZnF2:CQYYLKTGTCKFGATCKFHH
			8	5	3	ZnF3:CVYYLRTGQCKFASTCKFHH
			8	5	3	ZnF4:CQFYMKTGDCKFGAVCKFNH
			8	5	3	ZnF5:CTFYSRYGICKFGPNCKFDH
HvC3H23	HORVU.MOREX.r2.5HG0407060.1	2	8	5	3	ZnF1:CPFYFKIGACRHGDRCSRLH	MAEHLASIFGTEKDRVNCPFYFKIGACRHGDRCSRLHNKPSVSPTLLLCNMYQRPDMITP GVDAQGNPINPVKIQGDFEDFYEDIFDELSKHGEVENLHVCDNLADHLIGNVYVQFREED QAAKALQALQGRFYSGRPIIAEFSPVTDFREATCRQFEEHNCNRGGYCNFMHVKQIGRDL RKRLYGHLHSSRRSHSRSSRSPSPYRHHARDRDRSSRSKDRGDYYGGSLDRGDYGDYYHH SRRSSERNRNYDSDGSRRRRHRSRTRSPVREGSEERRAKIEQWNRERDAPARQGSEERRA KIEQWNRERETAQA*
			7	5	3	ZnF2:CRQFEEHNCNRGGYCNFMH
HvC3H24	HORVU.MOREX.r2.5HG0429150.1	2	8	5	3	ZnF1:CPFYLKTAACRFGVRCSRVH	MSTAAADLPAASTRSERRKERKKQRRRRARREAAAAARAAAEALAADPEEGRRLRELEEA EADASDRARRAFEDAERRWLEKAASRAAEEAAAEEEACAAEASTRDKYNDDHRDETEEDG EWEYVEDGPAEIIWQGNEIIVKKKKVKIPKKAEAKPLSQEEERPTSNPLPPQSVAVDSQR REPSLSARELLEKVAQETPNFGTEQDKAHCPFYLKTAACRFGVRCSRVHFYPDKSCTLLM KNMYNGPGLVLEQDEGLEFTDEEIEQSYEEFYEDVHTEFLKFGELVNFKVCRNGSFHLRG NVYVHYKALDSALLAYNSMNGRYFAGKQITCEFVALTKWKSAICGEYMRSRFKTCSHGVA CNFIHCFRNPGGDYEWADWDNPPPKYWTRKMAA…
			10	5	3	ZnF2:CGEYMRSRFKTCSHGVACNFIH
HvC3H25	HORVU.MOREX.r2.6HG0475520.1	2	8	5	3	ZnF1:CTRFFSAGDCPFGEDCRYLH	MSSTPDPDAPPREVERRITYSRESLLSVREARRHKLPAAIGACKREVEAASHMWWESEPR GGSKSEPPRTSKSKKMCTRFFSAGDCPFGEDCRYLHRVPNGHHEPNQTVTKKMSSLDLGG DEAQPRTPVSATAPATVKTRLCKNHGAPDGCKWGDRCHFAHGDGELGKPMGPGSSFKTRL CVSFVAGGSCAFAGRCHFAHGKEELRRPDAS*
			8	5	3	ZnF2:CVSFVAGGSCAFAGRCHFAH
HvC3H26	HORVU.MOREX.r2.6HG0475540.1	2	8	5	3	ZnF1:CVRFFSTAGCRFGDNCHFIH	MPTGLPPPSIIIFILRLASLLLPFFIHAIASCWYPRDSVNHGKCIRLKISAAGEMSSASA PRDDATMPREEEERVGVNARRTKRIMYSRELLLAVGSLDACKLLPAGADADLPKHPDDAT LWVPSQALAASSVGRTPGGLGDSEFLPQPKREQEAFEAGAGSKSKPCVRFFSTAGCRFGD NCHFIHDIPAPAQDEKEPAKLNPTPPSMSMQQPSHTGDHALRAPTPPNAAPASSGASATA KITVDASLAGAVIGRGGATIREISRASGARLCIREHERDAGLKNVELQGTPDQVKHASAM VWEHLPVPGGGQYNGVKTRLCAHFARGSCTYGDGCRFAHSESELRRPAPAARRDPCGW*
			7	5	3	ZnF2:CAHFARGSCTYGDGCRFAH
HvC3H27	HORVU.MOREX.r2.6HG0475570.1	2	8	5	3	ZnF1:CNKYNTAEGCKWGDKCHFAH	MEGVARKRGTADGANGATLGGKRTRESESFQTGVGSKSKPCTKFFSTAGCPFGEGCHFLH YFPGGHQAVAKMSNLGGQSFAHPQGRMPAGSAVPNGPPTPTVKTKLCNKYNTAEGCKWGD KCHFAHGERELGKHTFINNSMPPHMGPRPTTHFGPPAMPNPGMSTPAGFGASSTAKVSVD ASLAGAIIGRGGVNTKQISRVTGAKLAIRDHESNEALKNIELEGTFDQINNASAMLRELI FRISGGTNPNAPPSGESLAGGSHRGGGGGPGSNFKTKLCDNFTKGSCTFGDRCHFAHGES ELRKSAAA*
			7	5	3	ZnF2:CDNFTKGSCTFGDRCHFAH
HvC3H28	HORVU.MOREX.r2.6HG0505660.1	1	7	5	3	ZnF1:CTFYQNGVCSYGSRCRYEH	MSNRSICKFFVNGACFKGDYCQFSHDWNDQPNDVCTFYQNGVCSYGSRCRYEHVDVSSEY TPASTTAALAPSNSYRSWCPFYEGEIDVSNQTHKSLSACSVRQSTWRFDDEDSIPEDGNS LLSALNAQNQARHPLAHLPICSFAAAGTCPYGEECPQTHGDLCTTCGKQCLHPYRPSEGG AHIKLCKRNNKRLEALKKSEEIECSVCLDRVLSKPTAAEKRFGLLPECDHAFCITCIRKW RSSSLTSSMDMDSTVKACPICRKVSYYVIPSATWYSSKEEKQDIIDGYKAKLKSIDCRYF DFGRDTCPFGGRCFYKHAYTDGCLEEPATVAVLHFHADNGSMEGARNIGLAYLLSRLHL*
HvC3H29	HORVU.MOREX.r2.6HG0515160.1	1	7	5	3	ZnF1:CKFFAEGRCRRGETCPYLH	MAGVARKGRSKWDTQEISPDIVEISEDDSPPKNTDDRRKDGGDIPTQDLTNDNGKRVGES SNLKPDAFMHQGSTECEEERTDGLNKDVKERQSKASSERSHAPRMAEEGHNNDDWGKLAL EKTTGNQGMSRNADDRRRGDGWGTAVSRGYSSRVSSGPDAWKQRTRSPSPRGGAWNRSRR NGSDSRSRSRERGRGRSRSRSRSPYFDRGSDWRAERGRISGGPSLLCRDFTAGRCRRGLH CRFPHEDGGRRQFDEPYPADSRERYGHQNKDFLDPREPDDYVRSRQPRGHFDEGTWERSE PRRDYRPSDQCHEFVKGRCSRGASCRYVHDESASHVGWRDDARETAHVRGGPDLSYGNRT EHRREPKRPCKFFAEGRCRRGETCPYLHEDAPQ…
HvC3H30	HORVU.MOREX.r2.6HG0526270.1	2	9	5	3	ZnF1:CIYYLASPLTCNKGSECEYRH	MDSAAAAAQSQATHAPADEEEARRRRGTDCIYYLASPLTCNKGSECEYRHSDAARVNPRD CWYWFNGNCANAKCSFRHPPLDDMLGAPATPRAPQQPAPQVPVPAKAVPPNGTAKPVVPC YYFQKGMCAKGNLCTFSHGPQFAGNPALQLKNSNSWTKANNSPQQSTTPVVHGELKAGAQ NGRPAQKQNPTNRAYHSSGIYQNQNNNPYVLSGAAKSYQPHRSVEAESAENVMETGEFVR EPSAGSSVLAGSAEDDAERSIKEGHNSSYRRASGEQNSGVRRQAHGGYELERSSHRSSSD RLVSERRLTQRDSMPVTAESSDLRHRLLKQRRLNDSRSTEVPDRRDRRYPEDERDSHLRR RGEERTAHDSLSRSRLHGRIKLPGETSLDRLGP…
			7	4	3	ZnF2:CWYWFNGNCANAKCSFRH
HvC3H31	HORVU.MOREX.r2.7HG0560290.1	1	7	5	3	ZnF1:CTFYQRGSCSYGSRCRYDH	MTPVSRPRGRLHAPRRGPDLSFPTPPVFRNHSPVRYPRRKAELPPPQKKARRRDGTGRRA PDRQTDRQRGKRRPRRDPPQASPRRRDDGRRGEGVPGFGAHPLGPAMSTKRVLCKFFMHG ACLKGEYCEFSHDWSDQSNNVCTFYQRGSCSYGSRCRYDHVKVSRNNPVPPLPSSSAATR NPVRPPPSSSTATHVASTSLQLLSSGRPLHPGHQTNSSNQRQQISMDKLSLSESKPAWRN EVQPDSVSEDGIDWSSIQTAQNQTSMKLADMPICSFAAAGNCPYGEECPHMHGDLCAFCG KMCLHPYRPDERQEHIKLCEKNHKRLEALKRSQEIECSVCLDRVLSKPTAAERKFGLLSE CDHPFCISCIRNWRGNSPTSGMDVNSALRACPI…
HvC3H32	HORVU.MOREX.r2.7HG0579580.1	2	7	5	3	ZnF1:CCKFRAGTCPYVTNCNFAH	MDYTNAIHIIPDAAGPESWANSAAPPSGDSGIWATEDDYSQWNGDQGLSGGCYGGDRNSS QPHSRAGSEQPPPGKKPRGSGPSGGGDAGSTSKSRAIGKMFFKTKLCCKFRAGTCPYVTN CNFAHGMEELRKPPPNWQEIVAAHEEATEQREEHQIPIMTSSNVVPGDSVSGRAYKGRHC KKFYTEEGCPYGDTCTFLHDEQSKARESVAISLSPSVGGGSYNSAAAAAAPNGPTILKPS NWKTRICNKWEMTGYCPFGSKCHFAHGAAELHKYGGGLVDIDGRDIASTPDSKQAAASLK LPVETTAASTAVPPHADVYHLGSQSQRSALASQRSGQLQRPIQKWKGPDKISRIYGDWID ETD*
			8	5	3	ZnF2:CNKWEMTGYCPFGSKCHFAH
HvC3H33	HORVU.MOREX.r2.7HG0600900.1	3	8	5	3	ZnF1:CTKFFSTAGCPFGSSCHFLH	MDAGRKRAVPEGTNGGAATKRARESESVQTGVGSKSKPCTKFFSTAGCPFGSSCHFLHNF PGGHQAVSKMTNLGGPAVSAPPGRMPMGPGVPDGPPPSMKTRLCNKFNTAEGCKWGNKCH FAHGERELGKPMLLNNSMAPPMGPRPNGHFQPPPMPGPDMVPPSTFGASATAKISVDASL AGAIIGKGGVNTKHISRMTGAKLAIRDNEADPNHKNIELEGSFDQVNHASAMVKELILRI GGNAPPQAKNAGRGPAGGGGSNFKTKLCDNFNKGSCTFGDRCHFAHGESELRKSAAA*
			8	5	3	ZnF2:CNKFNTAEGCKWGNKCHFAH
			7	5	3	ZnF3:CDNFNKGSCTFGDRCHFAH
HvC3H34	HORVU.MOREX.r2.7HG0602740.1	1	7	5	3	ZnF1:CRNYQRGSCKYGEQCRFVH	MNRRPELCRNYQRGSCKYGEQCRFVHANSNQHQQQQQAKPNPFGFGAGSRQQPQQSFGAQ SQQFQQQQQKPNPFGFGVQGGAAQQRNESGPAKPFQNKWVRDPSAPQTKQGEAQPAPQPA HTSCTDPESCRQQISDDFKNEAPLWKLTCYAHLRSGPCDITGDISYEELRAKAYEEGKQG KPMQSIVEGERNLQNAKLMEFTNLLNKACSTPSFPTAGSFPEVKNNSTFGSSQTNGPPVF SSFNQLGAATNFGSGPRTAAPGVPTNTIFGQPTLTFGQSTQSTFGRSTQSTPSFGAPTFG STGMKFGVPDAFGSQTSKQSFGSYHNSSMSSNNNFPNSISSSHHRDIDKQSVELLNGMTP RTSAMDQAPIEDSRNDKQDDSIWLKEKWEIGQI…
HvC3H35	HORVU.MOREX.r2.7HG0607870.1	1	7	5	3	ZnF1:CALWRRGSCPRGPSCGFAH	MREMLDPPPRRGPAFKTKLCALWRRGSCPRGPSCGFAHGEGELRTPPPYSTFPPRAGPGG RDHRIHEFRGRPERRNSPRRRYSPDRDTRGRLFRNQMPRSRGSSQSRSPIRKSERRPKKK VDGEKSDSSGSFNTSENEDRKKDDRRSSSDEKDDGEAQLKQIALDMKALHEDKSKLQMIL DKKIDEAGIISGRVDDLESQLNKEKEDCERMTSKIKKLIKAYGRYVKAQDDLKRSQGRFE RLADSLASDSLKSGTKEQESSVNAGNDDPYNAYEMCPDDQRQKNGSAARKRSAALSTSEE EKTGKKRRVNGIDMIHVPRKYLPEDALESLKNSKGTESLKKFGEDDNNDEINVISSGNDF TDRYNGNEEGDPVDL*
