# Supplementary material for: CCCH Zinc Finger Genes in Barley: Genome-Wide Identification, Evolution, Expression and Haplotype Analysis
Source: Research Square preprint supplement (doi:10.21203/rs.3.rs-1114922/v1), 2021-11-30
Supplement: Supplementary file 4 [file d215269b3983c4a5d7feae49.xlsx]

## Sheet: TableS12
Table S12.Passport information of 95 landraces and 51 wild barley accessions.
Accession number	Sample	Longitude	Latitude	Type
ERR753340	93-HS1	-7.5	30.5	landrace
ERR753221	BCC003	65.75	34.6333	landrace
ERR753262	BCC103	36.2667	32.1167	landrace
ERR753322	BCC108	35.7333	34.3333	landrace
ERR753220	BCC126	-5.79	31.37	landrace
ERR753209	BCC131	-3.05	32.05	landrace
ERR753205	BCC1481	34.35	61.7833	landrace
ERR753211	BCC1487	47.5019	42.975	landrace
ERR753226	BCC1488	142.64	51	landrace
ERR753228	BCC1494	57.1814	50.2981	landrace
ERR753227	BCC1503	58.3836	37.9417	landrace
ERR753231	BCC1589	12.7333	37.9333	landrace
ERR753222	BCC167	57.3333	22.6667	landrace
ERR753243	BCC168	57.6667	23.1667	landrace
ERR753309	BCC169	57.25	25.6667	landrace
ERR753092	BCC185	46.7167	24.6333	landrace
ERR753210	BCC192	38.9597	36.3833	landrace
ERR753258	BCC21	30.71	28.3119	landrace
ERR753260	BCC51	34.4833	30.5667	landrace
ERR753318	BCC54	32.5167	30.8167	landrace
ERR753225	BCC761	83.7361	28.3561	landrace
ERR753150	FT172	35.7307	33.2294	spontaneum
ERR753151	FT175	35.6455	33.2511	spontaneum
ERR753152	FT219	35.7635	33.2872	spontaneum
ERR753214	FT226	35.2236	31.7792	landrace
ERR753154	FT232	41.65	36.4167	spontaneum
ERR753155	FT252	44.4833	37.25	spontaneum
ERR753331	FT262	37.2833	36.7808	spontaneum
ERR753156	FT268	38.8814	35.1672	spontaneum
ERR753157	FT270	36.8361	33.6542	spontaneum
ERR753158	FT272	36.05	32.2167	spontaneum
ERR753159	FT276	35.6667	32.5833	spontaneum
ERR753334	FT279	69	35.75	spontaneum
ERR753161	FT332	48.1833	33.8167	spontaneum
ERR753162	FT338	35.4167	33	spontaneum
ERR753165	FT359	-6.83	34.02	landrace
ERR753168	FT376	62.3417	35.2758	spontaneum
ERR753341	FT380	27.2333	31.35	landrace
ERR753343	FT390	91.1	29.65	landrace
ERR753235	FT414	44.21	15.36	landrace
ERR753173	FT507	43.4167	36.3833	spontaneum
ERR753174	FT512	35.8208	35.6056	spontaneum
ERR753208	FT519	112	31	landrace
ERR753239	FT520	75.2808	42.8186	landrace
ERR753240	FT521	2.68333	42.7333	landrace
ERR753259	FT555	41.1667	39.1833	landrace
ERR753257	FT561	80.9167	29.25	landrace
ERR753175	FT566	56.683	38.417	spontaneum
ERR753176	FT567	61.8833	41.05	spontaneum
ERR753177	FT568	63.183	34.5	spontaneum
ERR753179	FT578	43.1	40.65	spontaneum
ERR753180	FT581	41.7167	37.9667	spontaneum
ERR753196	FT582	42.0989	37.0925	spontaneum
ERR753187	FT584	40.4975	36.9669	spontaneum
ERR753204	FT589	37.0069	35.0289	spontaneum
ERR753203	FT590	36.7025	35.0133	spontaneum
ERR753181	FT592	41.0856	37.0738	spontaneum
ERR753185	FT595	42.1667	36.3333	spontaneum
ERR753184	FT604	43.1667	36.0833	spontaneum
ERR753183	FT611	51.25	35.5	spontaneum
ERR753194	FT628	36.3789	32.5964	spontaneum
ERR753265	FT630	35.8667	33.4667	spontaneum
ERR753267	FT632	42.0706	37.0778	spontaneum
ERR753270	FT660	45.7	36.75	spontaneum
ERR753271	FT661	47.2	38.5	spontaneum
ERR753337	FT670	36.9322	36.9922	spontaneum
ERR753288	FT671	35.9167	33.8333	spontaneum
ERR753279	FT731	37.2814	37.4239	spontaneum
ERR753278	FT733	36.4672	36.2558	spontaneum
ERR753289	FT734	38.7786	37.4103	spontaneum
ERR753272	FT735	39.955	37.7919	spontaneum
ERR753287	FT741	41.4525	37.6814	spontaneum
ERR753290	FT746	36.7281	36.9786	spontaneum
ERR753291	FT747	36.9519	36.8661	spontaneum
ERR753277	FT748	37.7347	37.315	spontaneum
ERR753285	FT754	40.0006	36.95	spontaneum
ERR753284	FT871	67.6932	40.0711	spontaneum
ERR753336	FT873	66.625	38.3111	spontaneum
ERR753281	FT875	67.4358	38.0753	spontaneum
ERR753280	FT878	46.0192	34.4427	spontaneum
ERR753282	FT885	68.6135	38.624	spontaneum
ERR753339	FT886	69.2394	38.3422	spontaneum
ERR753142	HOR10103	13.9181	25.9161	landrace
ERR753143	HOR10130	9.50028	30.1328	landrace
ERR753216	HOR10152	14.8831	26.2258	landrace
ERR753125	HOR10280	13.5333	26.8031	landrace
ERR753136	HOR10350	36.47	8.15	landrace
ERR753126	HOR10410	21.3317	52.4061	landrace
ERR753273	HOR10551	13.7522	37.5786	landrace
ERR753117	HOR10609	43.2569	36.1664	landrace
ERR753107	HOR10610	43.2567	36.4433	landrace
ERR753286	HOR10627	42	34.8333	landrace
ERR753139	HOR10705	44.7289	42.1772	landrace
ERR753109	HOR10761	38.2333	5.63333	landrace
ERR753118	HOR10782	13.8825	41.9017	landrace
ERR753137	HOR1133	2.21361	46.2167	landrace
ERR753189	HOR1192	29.0061	38.2928	landrace
ERR753264	HOR12762	67.9	38.2833	landrace
ERR753236	HOR12830	38.0865	36.7014	landrace
ERR753144	HOR13416	-8.83333	31.05	landrace
ERR753244	HOR14153	18.7919	12.0428	landrace
ERR753245	HOR14279	39.4292	14.6983	landrace
ERR753132	HOR203	36.4872	50.0992	landrace
ERR753320	HOR2458	91.1	29.65	landrace
ERR753274	HOR2766	23.31	24.05	landrace
ERR753112	HOR2792	50.85	30.5167	landrace
ERR753232	HOR2800	48.8167	31.5333	landrace
ERR753106	HOR354	9.11667	47.9833	landrace
ERR753133	HOR383	25.9586	43.8544	landrace
ERR753202	HOR3938	-16.78	28.21	landrace
ERR753102	HOR3950	13.1667	47.0064	landrace
ERR753123	HOR3959	12.6447	47.2722	landrace
ERR753134	HOR396	27.7669	42.3144	landrace
ERR753120	HOR4150	3.21667	36.7	landrace
ERR753129	HOR4469	36.0333	32.685	landrace
ERR753200	HOR454	27.9167	40.65	landrace
ERR753283	HOR4720	23.7139	56.6483	landrace
ERR753193	HOR5702	36.8333	7.66667	landrace
ERR753219	HOR6360	36.8833	7.46667	landrace
ERR753140	HOR713	22.1833	37.6667	landrace
ERR753135	HOR7380	18.8322	49.5197	landrace
ERR753190	HOR742	18.4167	43.8667	landrace
ERR753201	HOR7436	18.8928	49.3572	landrace
ERR753122	HOR752	21.8242	39.0742	landrace
ERR753124	HOR756	20.1892	40.7878	landrace
ERR753324	HOR758	21.4522	42.0036	landrace
ERR753131	HOR7969	37	38	landrace
ERR753213	HOR8113	29.5	39.25	landrace
ERR753116	HOR8455	47.8167	30.5	landrace
ERR753128	HOR8635	22.1411	48.5281	landrace
ERR753195	HOR8826	20.9592	49.4214	landrace
ERR753217	HOR8827	20.6	49.6333	landrace
ERR753199	HOR8842	-6.75333	37.5733	landrace
ERR753130	HOR902	36.3311	41.2928	landrace
ERR753110	HOR937	21.8242	39.0742	landrace
ERR753127	HOR9453	23.5997	46.7772	landrace
ERR753115	HOR9827	13.9833	32.7667	landrace
ERR753141	HOR9888	22.6392	32.7636	landrace
ERR753105	HOR9919	6.30569	45.4322	landrace
ERR753306	SBCC002	-2.67	42.85	landrace
ERR753321	SBCC003	-3.15	40.63	landrace
ERR753323	SBCC014	-5.07	37.53	landrace
ERR753315	SBCC095	-6.85	40.98	landrace
ERR753307	SBCC144	-17.81	28.8	landrace
ERR753317	SBCC147	-4.77	43.07	landrace
ERR753312	SBCC158	1.52	41.98	landrace
